# Supplementary material for: Single Nanoplastics Detection and Nano-Chemical Analysis of Surface Degradation in Commercial Bottled Water
Source: Research Square preprint supplement (doi:10.21203/rs.3.rs-6719488/v1), 2025-09-12
Supplement: Supplementary file 1 [file 6e966b2dd9897e3615a919ca.docx]

**Supplementary Information**

**Single Nanoplastics Detection and Nano-Chemical Analysis of Surface Degradation in Commercial Bottled Water**

Clementina Vitali1,2, Michel W.F. Nielen1,2, Hans-Gerd Janssen1,3°, Anna K. Undas2, and Francesco Simone Ruggeri1,4*

*1 Wageningen University, Laboratory of Organic Chemistry, Stippeneng 4, 6708 WE, Wageningen, NL*

*2 Wageningen Food Safety Research, Wageningen University & Research, Akkermaalsbos 2, 6708 WB Wageningen, NL*

*3 Unilever Foods Innovation Centre – Hive, Bronland 14, 6708 WH Wageningen, NL*

*4 Wageningen University, Physical Chemistry and Soft Matter, Stippeneng 4, 6708 WE, Wageningen, NL*

* Corresponding author:

Email: [simone.ruggeri@wur.nl](mailto:simone.ruggeri@wur.nl)

Table of Contents

[Supplementary Notes 3](#_Toc198510356)

[SI Notes 1 – Total fluorescence analysis 3](#_Toc198510357)

[SI Notes 2 – Comparison of Zinc Sulfide and Zinc Selenide substrates for MPs/NPs analysis 4](#_Toc198510358)

[SI Notes 3 – ATR-FTIR bulk analysis of commercial PET and Bio-HDPE bottles 5](#_Toc198510359)

[Supplementary Figures 6](#_Toc198510360)

[Figure S1. Roughness analysis of bare substrates. 6](#_Toc198510361)

[Figure S2. Impurity analysis on bare substrates. 7](#_Toc198510362)

[Figure S3. ATR-FTIR spectra of microplastic standards. 8](#_Toc198510363)

[Figure S4. AFM-IR and nano-polarimetry analysis of standard PE MP. 9](#_Toc198510364)

[Figure S5. ATR-FTIR bulk analysis of commercial PET and Bio-HDPE bottles. 10](#_Toc198510365)

[Figure S6. Physicochemical analysis of nanoparticles isolated from bottled water. 11](#_Toc198510366)

[Figure S7. Nile Red Characterization. 12](#_Toc198510367)

[Supplementary Tables 13](#_Toc198510368)

[Table S1. Poly(ethylene terephthalate) peak assignment. 13](#_Toc198510369)

[Table S2. Poly(lactic acid) peak assignment 14](#_Toc198510370)

[Table S3. Poly(hydroxy butyrate) peak assignment. 15](#_Toc198510371)

[Table S4. Polyethylene peak assignment. 16](#_Toc198510372)

[Table S5. Polypropylene peak assignment. 17](#_Toc198510373)

[Table S6. Polystyrene peak assignment. 18](#_Toc198510374)

[Table S7. Nile Red peak assignment. 19](#_Toc198510375)

# Supplementary Notes

## SI Notes 1 – Total fluorescence analysis

Fluorescence images were captured using an Olympus BX51 microscope, fitted with 4x, 10x, 20x, and 40x Olympus objectives, an Olympus SC50 RGB camera, an Olympus U-RFL-T UV lamp, and a bandpass filter with excitation wavelengths of 460-490 nm and emission wavelengths greater than 515 nm. The images were collected by built-in software cellSens and processed in ImageJ (version 1.54) by subtracting the background (rolling ball radius of 25 px) and applying a median filer (radius of 5 px).

The threshold on the Z axis (grey value) to distinguish fluorescent particles from background noise was calculated by multiplying the background mean grey value by a factor of 5. The particles analysis was further refined by excluding particles with a maximum diameter on the XY plane smaller than the value obtained by multiplying the pixel size by a factor of 3. The grey values of each pixel belonging to the detected particles were summed to obtain the total fluorescence measurement.

## SI Notes 2 – Comparison of Zinc Sulfide and Zinc Selenide substrates for MPs/NPs analysis

Zinc Sulfide (ZnS) and Zinc Selenide (ZnSe) IR transparent windows (Crystran Limited, Poole, United Kingdom) were characterized and compared to select the most suitable substrate for the infrared nanospectroscopy analysis of MPs and NPs.

**Roughness.** The roughness of the surface of ZnS and ZnSe substrates was assessed at different scales. Atomic Force Microscopy (AFM) maps were acquired with a MultiMode 8 AFM and its built-in software Nanoscope (version 9.7, Bruker) operating in Peak Force tapping mode and equipped with ScanAsyst-air silicon tip with a nominal radius of ~2 nm and an elastic constant of about 0.4 N m-1. AFM morphology maps of 5 × 5 µm, 10 × 10 µm, and 50 × 50 µm were acquired in triplicates with a resolution of 2.5 nm px-1, 5 nm px-1, and 20 nm px-1 respectively. Further studies were performed on three separate windows by acquiring on each of them triplicates of 10 × 10 µm AFM maps with a resolution of 5 nm px-1. Image flattening (first or second order) and root mean square (RMS) roughness measurement were performed in MountainsSPIP (version 10, Digital Surf, France) software.

**Fig.** **S1** illustrates representative AFM maps at the three different scales for both ZnS (**Fig. S1**A) and ZnSe (**Fig. S1**B). Mean values of RMS (n = 3) are reported as well (**Fig. S1**C-D). Overall, ZnSe showed lower RSM values compared to ZnS. A reduced roughness represents an advantage for particles analysis as the size detection limit is calculated by multiplying the RMS by a factor of 3. Accordingly, RMS values obtained at the 10 × 10 µm scale for ZnS (7 ± 2 nm, mean ± SD, n = 9) and ZnSe (1.8 ± 0.4 nm, mean ± SD, n = 9) were used to establish the thresholds for particle analysis.

**Particle analysis.** For both ZnS and ZnSe particle analysis was performed on three separate windows by acquiring on each of them triplicates of 10 × 10 µm AFM maps with a resolution of 5 nm px-1. Particle analysis was performed in MountainsSPIP (Digital Surf, France) software. The threshold on the Z axis (height) to distinguish particles from background noise was calculated by multiplying the RMS by a factor of 3. The particles analysis was further refined by excluding particles with a convoluted maximum diameter on the XY plane smaller than the value obtained by multiplying the pixel size by a factor of 3 and excluding particles with a roundness lower than 0.3.

Threshold values for height, lateral resolution, and roundness obtained for ZnS and ZnSe are reported in **Fig. S2**. Furthermore, **Fig. S2** illustrates the particle size distributions of residual impurities detected on the surface of ZnS and ZnSe substrates. For ZnS, the heights of residual particles are distributed around an average of 25 ± 15 nm (average of the means ± SD, n = 9) and the major diameters on the XY plane (convoluted values) around an average of 50 ± 90 nm (average of the means ± SD, n = 9; **Fig. S2**). The upper 95% confidence interval, useful to statistically discriminate residual impurities from analyte deposited on the substrate at a later stage, is estimated as 30 nm for particle height and 137 nm for the convoluted maximum diameter. For ZnSe, the heights of residual particles are distributed around an average of 20 ± 10 nm (average of the means ± SD, n = 9) and the convoluted major diameters around an average of 50 ± 30 nm (average of the means ± SD, n = 9; Fig. S2). The upper 95% confidence interval is estimated to be 39 nm for particle height and 95 nm for the convoluted maximum diameter.

ZnSe was selected for the infrared nanospectroscopy analysis of NPs due to the narrower size distribution of residual impurities which enables effective statistical discrimination between impurities and analytes.

## SI Notes 3 – ATR-FTIR bulk analysis of commercial PET and Bio-HDPE bottles

Attenuated Total Reflection infrared spectroscopy (ATR-FTIR) analysis of the PET and Bio-HDPE bottles and their caps were performed using a Bruker Tensor27 spectrometer equipped with a diamond ATR element. Spectra were collected by built-in software OPUS (version 7.8, Bruker, USA). ATR-FTIR spectra of the bottles and their caps were acquired pressing the inner surface of the samples against the ATR element. Each sample was analysed in triplicate measuring different areas, for each replicate 5 spectra (with 256 co-averages) were acquired with a resolution of 4 cm−1. All spectra were processed using OriginPro 2020 (OriginLab Corp., USA) software: the spectra were smoothed applying a Savitzky–Golay filter (second order, 11 pts), baselined, averaged, and normalized.

Resulting spectra are reported in **Fig.S5**.

# Supplementary Figures


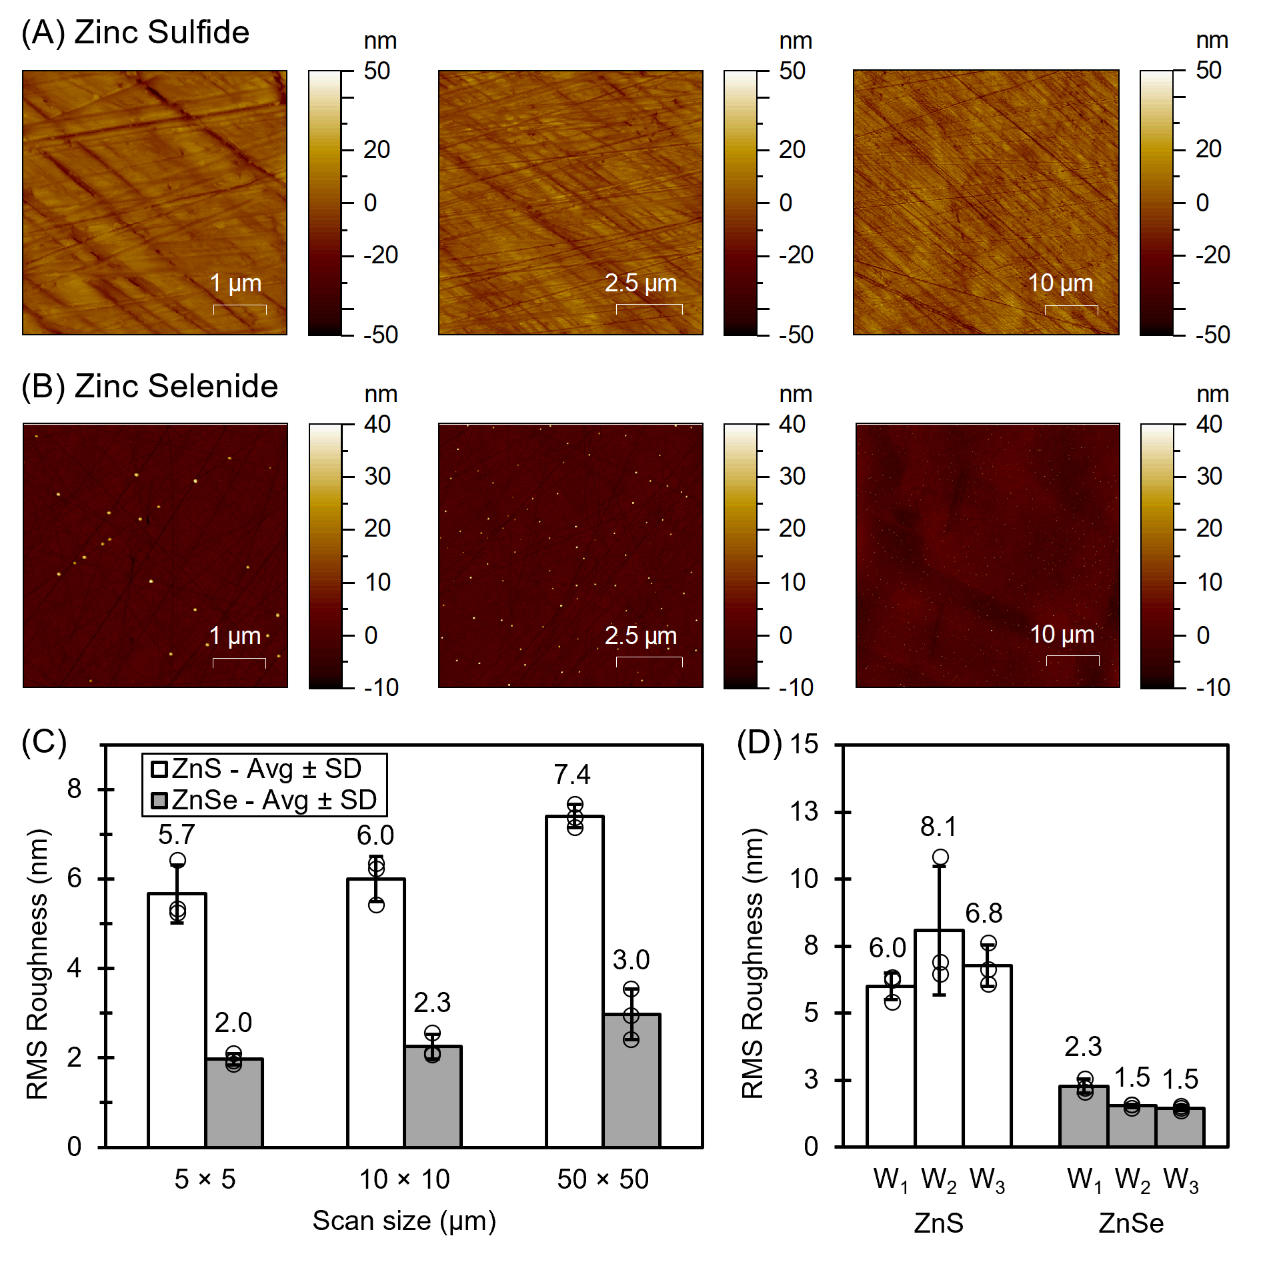


Figure S1. Roughness analysis of bare substrates. Representative AFM morphology maps of (A) Zinc Sulfide (ZnS) and (B) Zinc Selenide (ZnSe) substrates. (C) Root mean square (RMS) roughness measurement at increasing scales, data labels refer to mean values and error bars to standard deviation (n = 3). (D) RMS roughness measurement performed on three separate windows (W) for each material, data labels refer to mean values and error bars to standard deviation (n = 3).


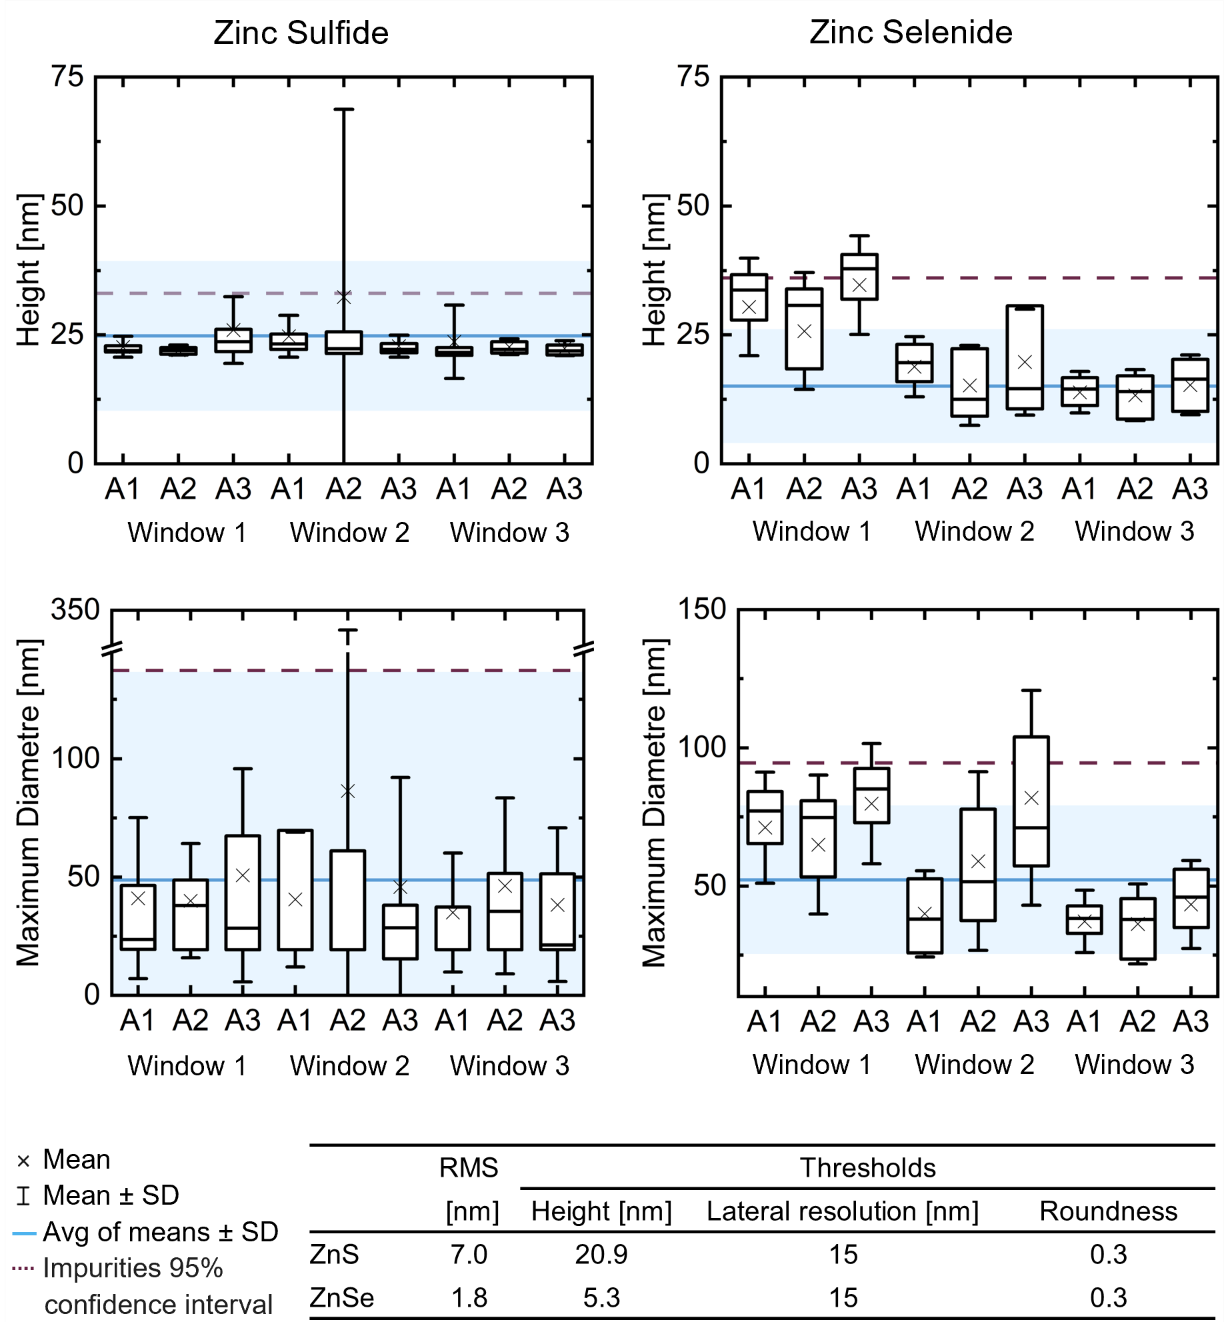


Figure S2. Impurity analysis on bare substrates. Particle analysis of residual impurities on the surface of Zinc Sulfide (ZnS) and Zinc Selenide (ZnSe) substrates. Including height and convoluted maximum diameter distribution of impurities detected by AFM analysis of nine 10×10 μm areas (A) randomly selected on 3 separate windows (W). Thresholds for the particle analysis are reported as well.

**
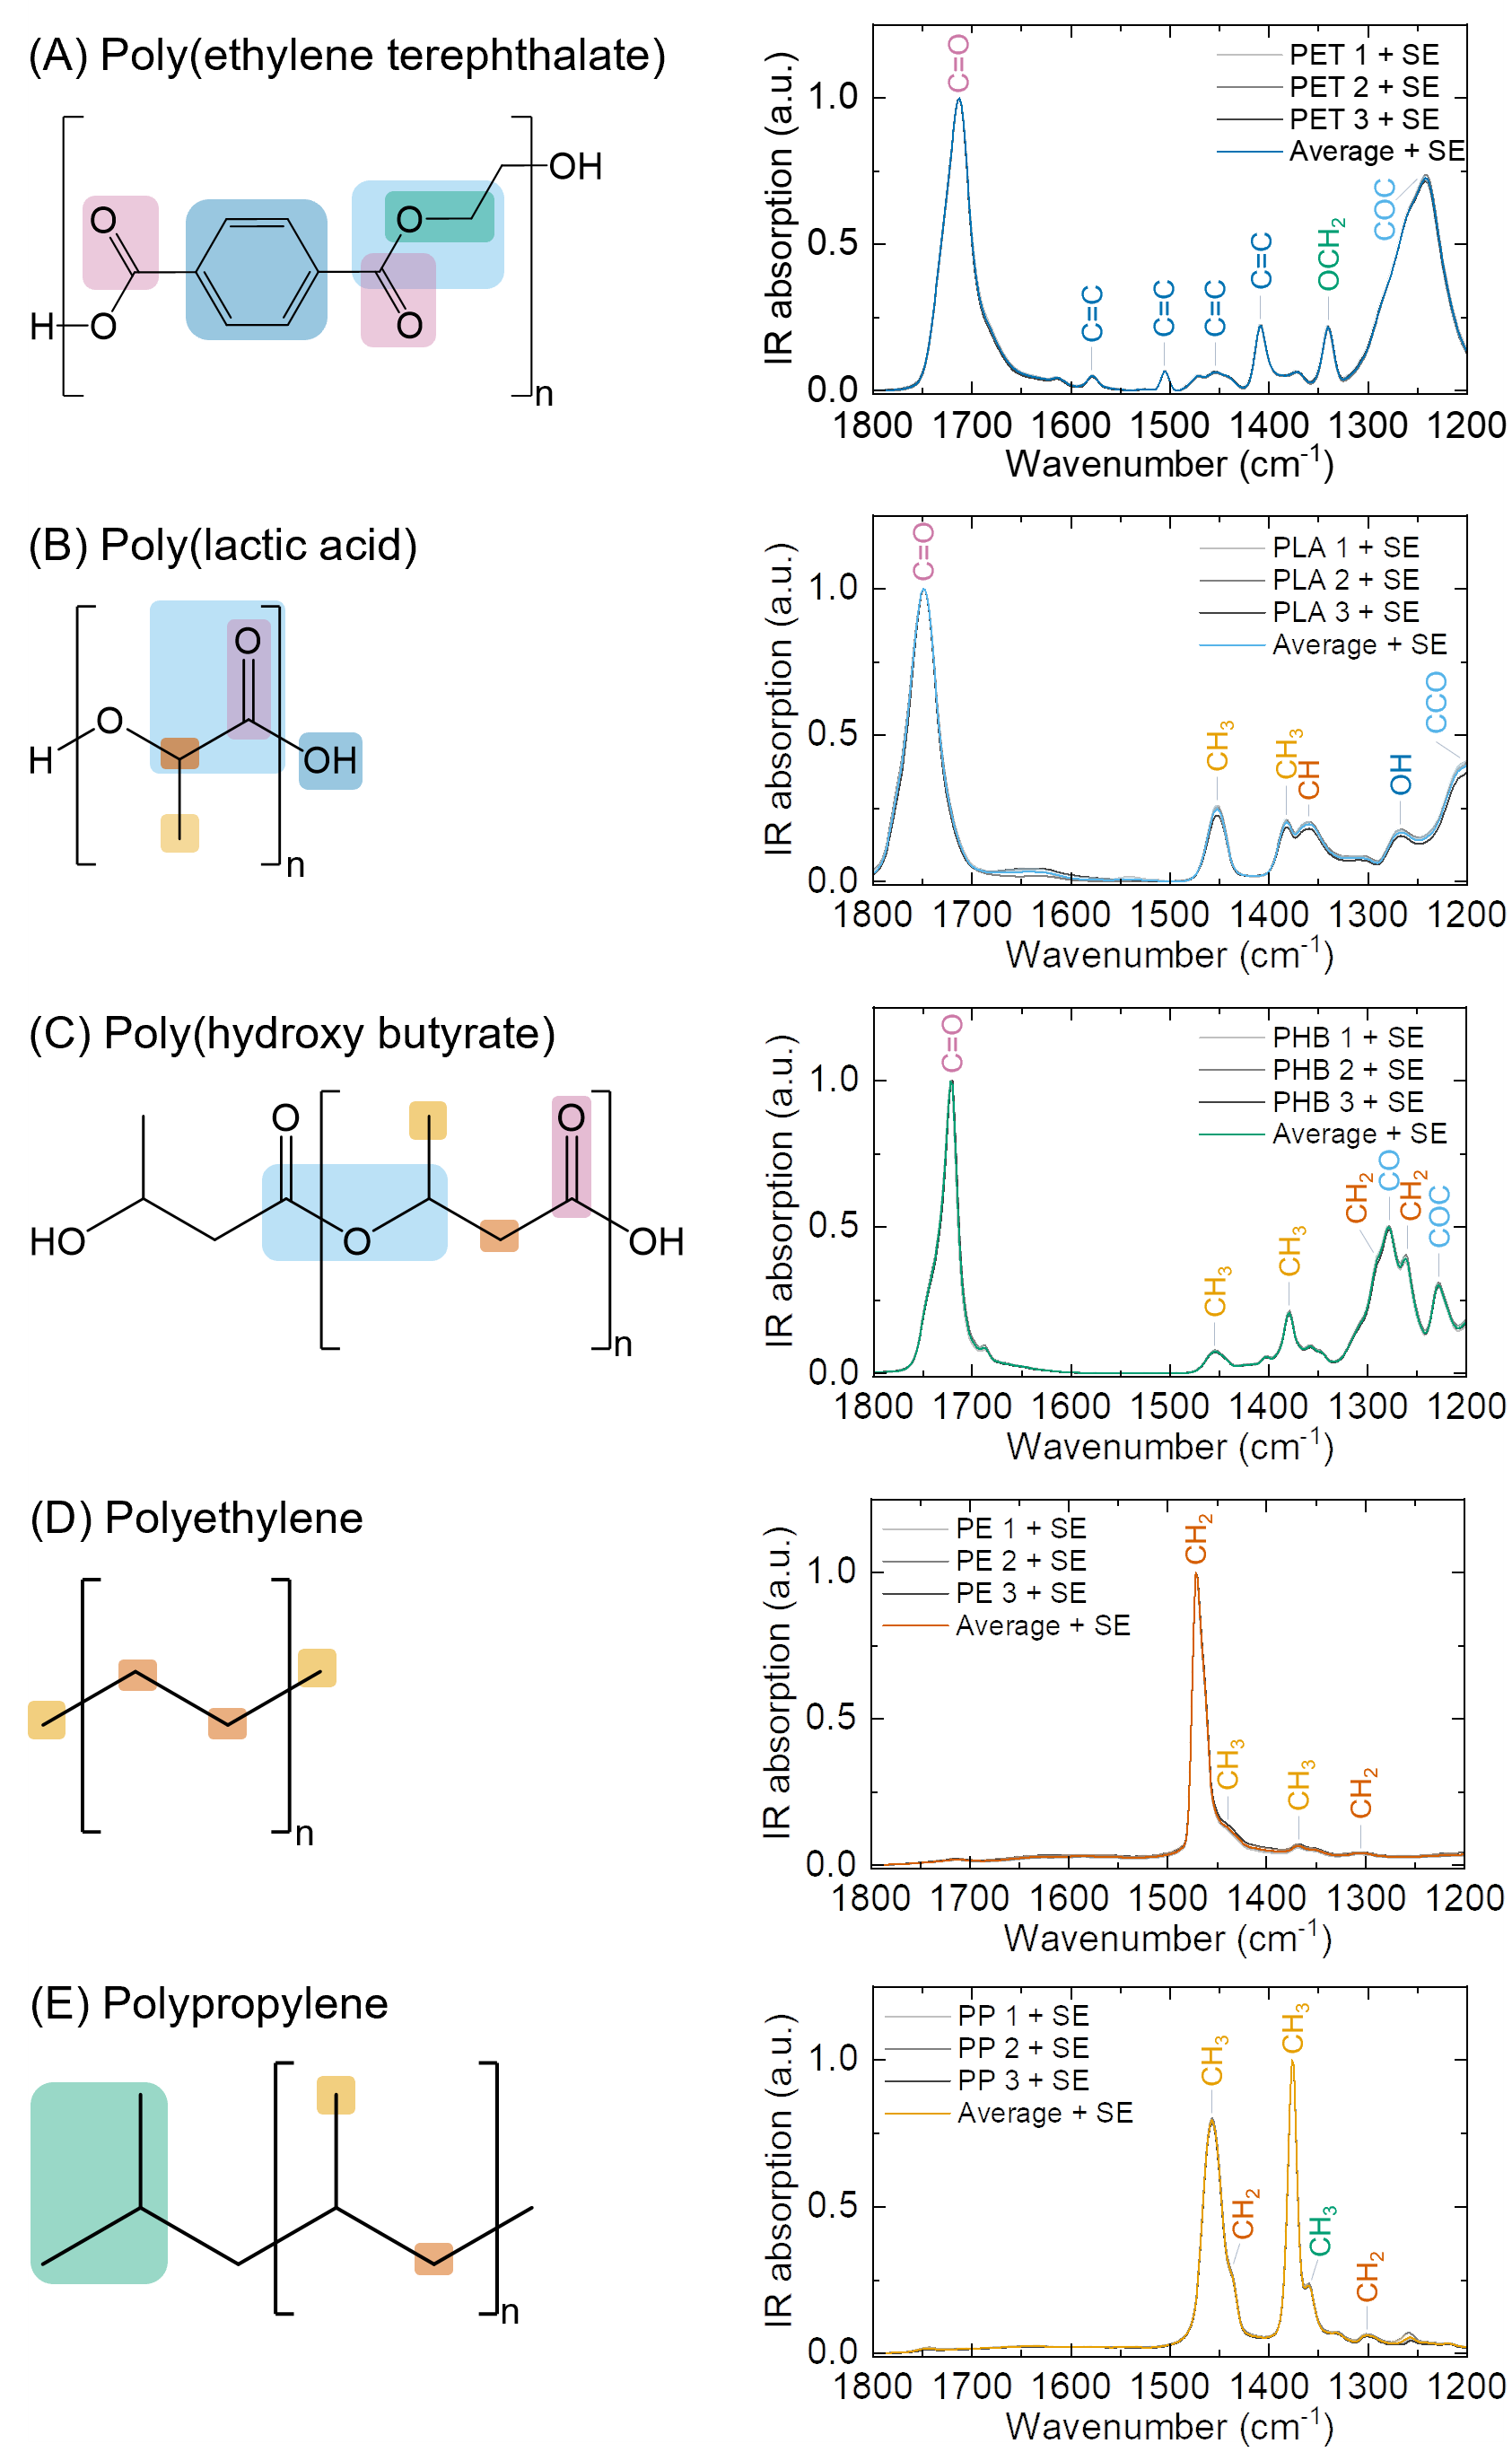
**

Figure S3. ATR-FTIR spectra of microplastic standards. Chemical structures and attenuated total reflection infrared spectroscopy (ATR-FTIR) spectra of microplastic (MP) standards relevant for the analysis of MPs and nanoplastics (NPs) in bottled water. Average ± standard error (SE) of N = 3 independent measurements plotted in varying grayscale intensity, each with n = 5 spectra with 256 co-averaging. Peak assignment and relative functional groups are color coded.


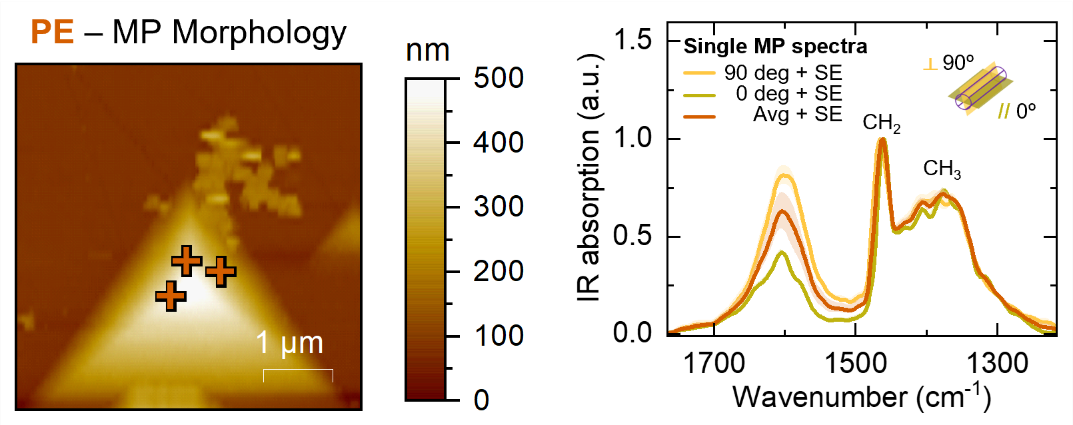


Figure S4. AFM-IR and nano-polarimetry analysis of standard PE MP. AFM-IR physicochemical characterization of PE standards via AFM morphology mapping and nano-localised IR spectra. Average (Avg) ± Standard Error (SE), N = 3 independent measurements, each with n = 5 spectra at 90° and n = 5 spectra at 0° polarisation. Crosses on the AFM maps indicate the location of acquisition of the AFM-IR spectra.


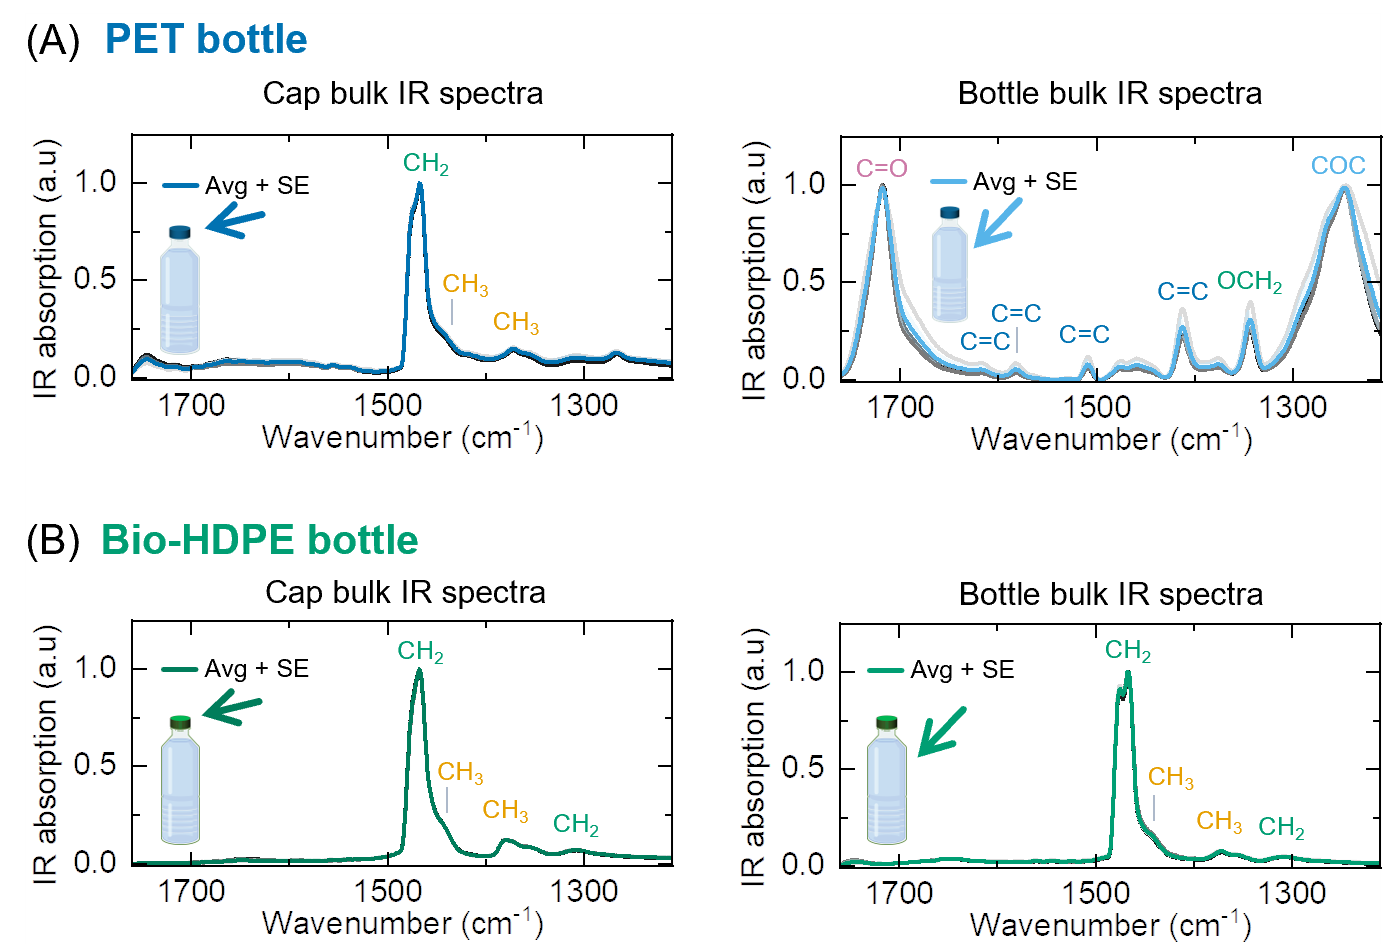


Figure S5. ATR-FTIR bulk analysis of commercial PET and Bio-HDPE bottles. AFM-IR physicochemical characterization of PE standards via AFM morphology mapping and nano-localised IR spectra. Average (Avg) ± standard error (SE) of N = 3 independent measurements plotted in varying grayscale intensity, each with n = 5 spectra with 256 co-averaging.


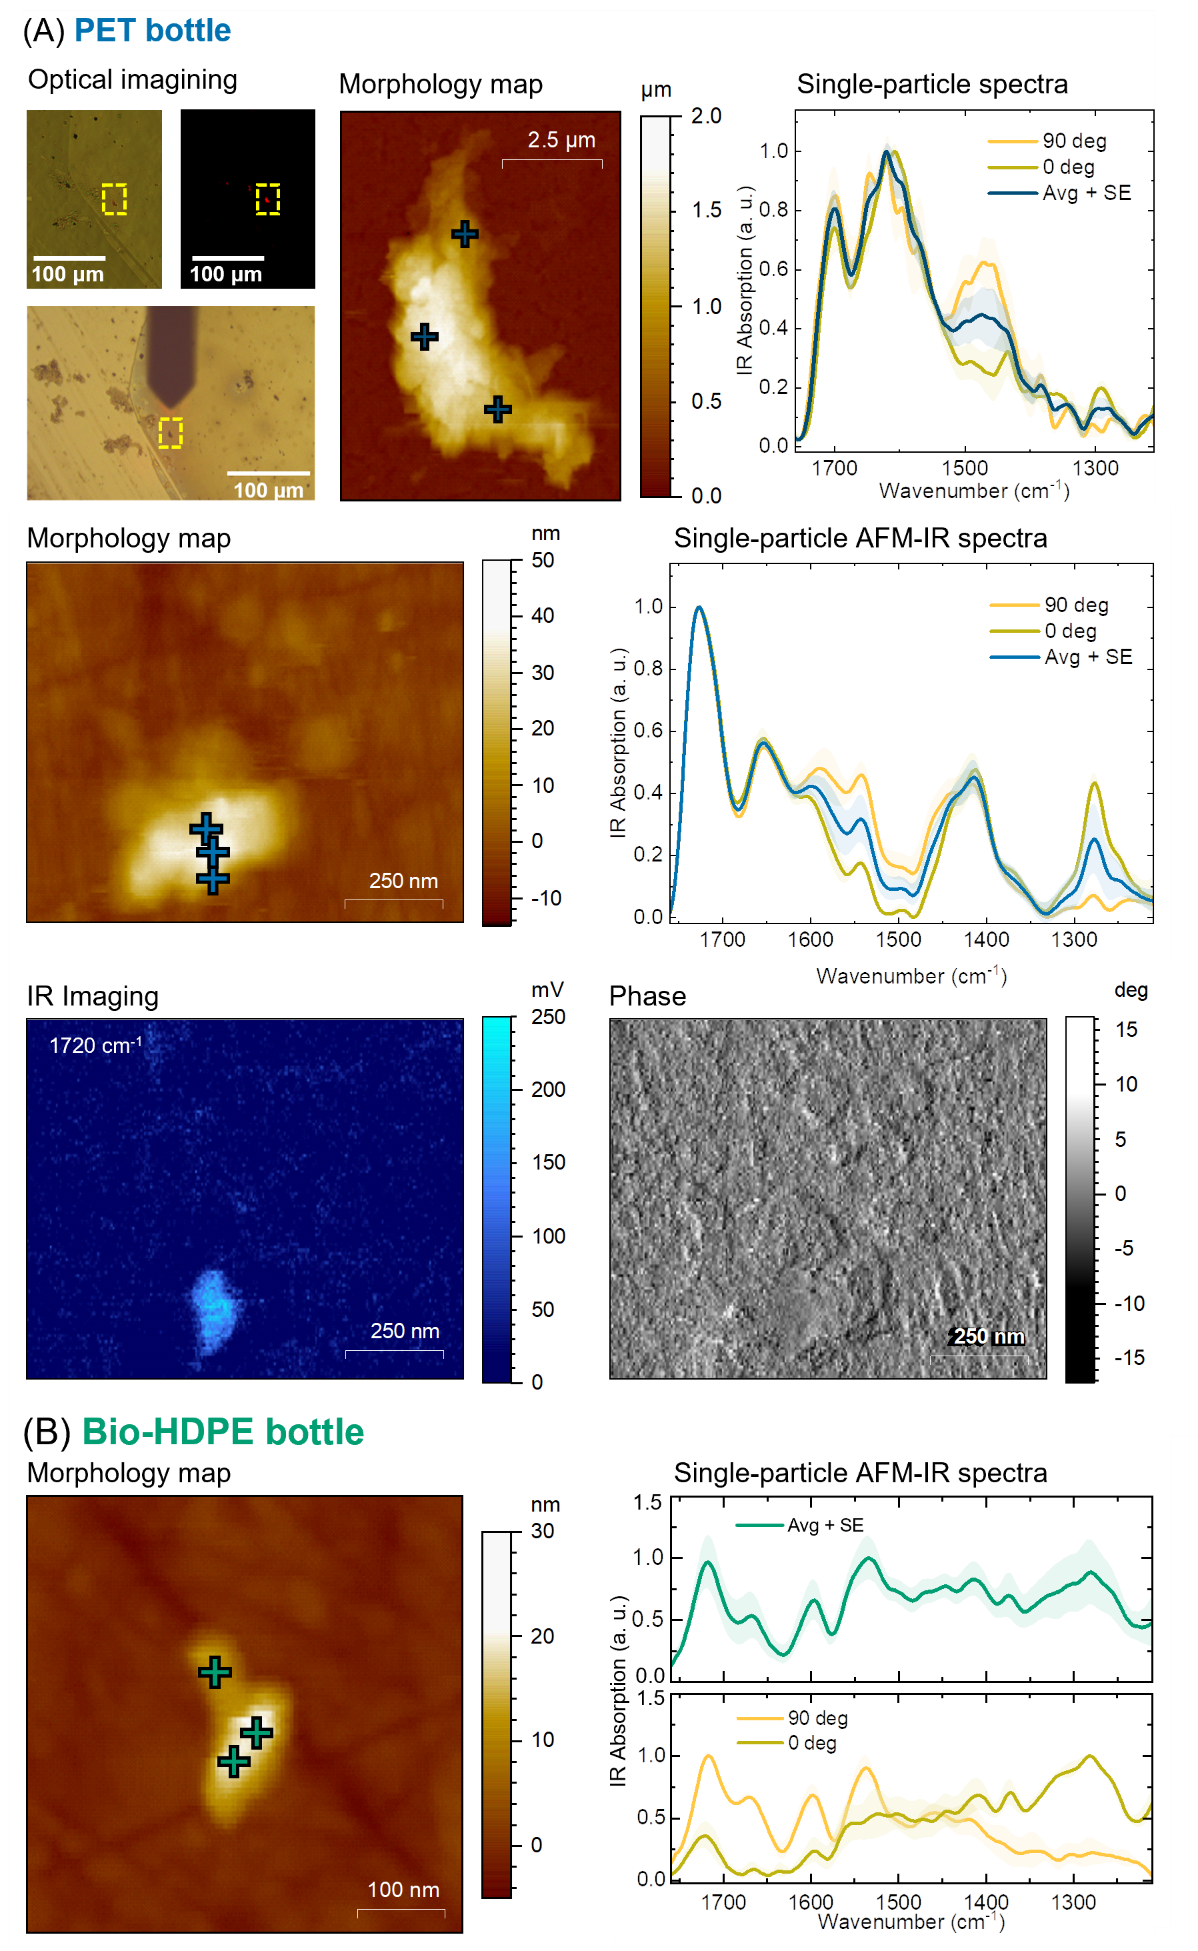


Figure S6. Physicochemical analysis of nanoparticles isolated from bottled water. Average (Avg) ± Standard Error (SE), N = 3 independent measurements, each with n = 5 spectra at 90° and n = 5 spectra at 0° polarisation. Crosses on the AFM maps indicate the location of acquisition of the AFM-IR spectra.


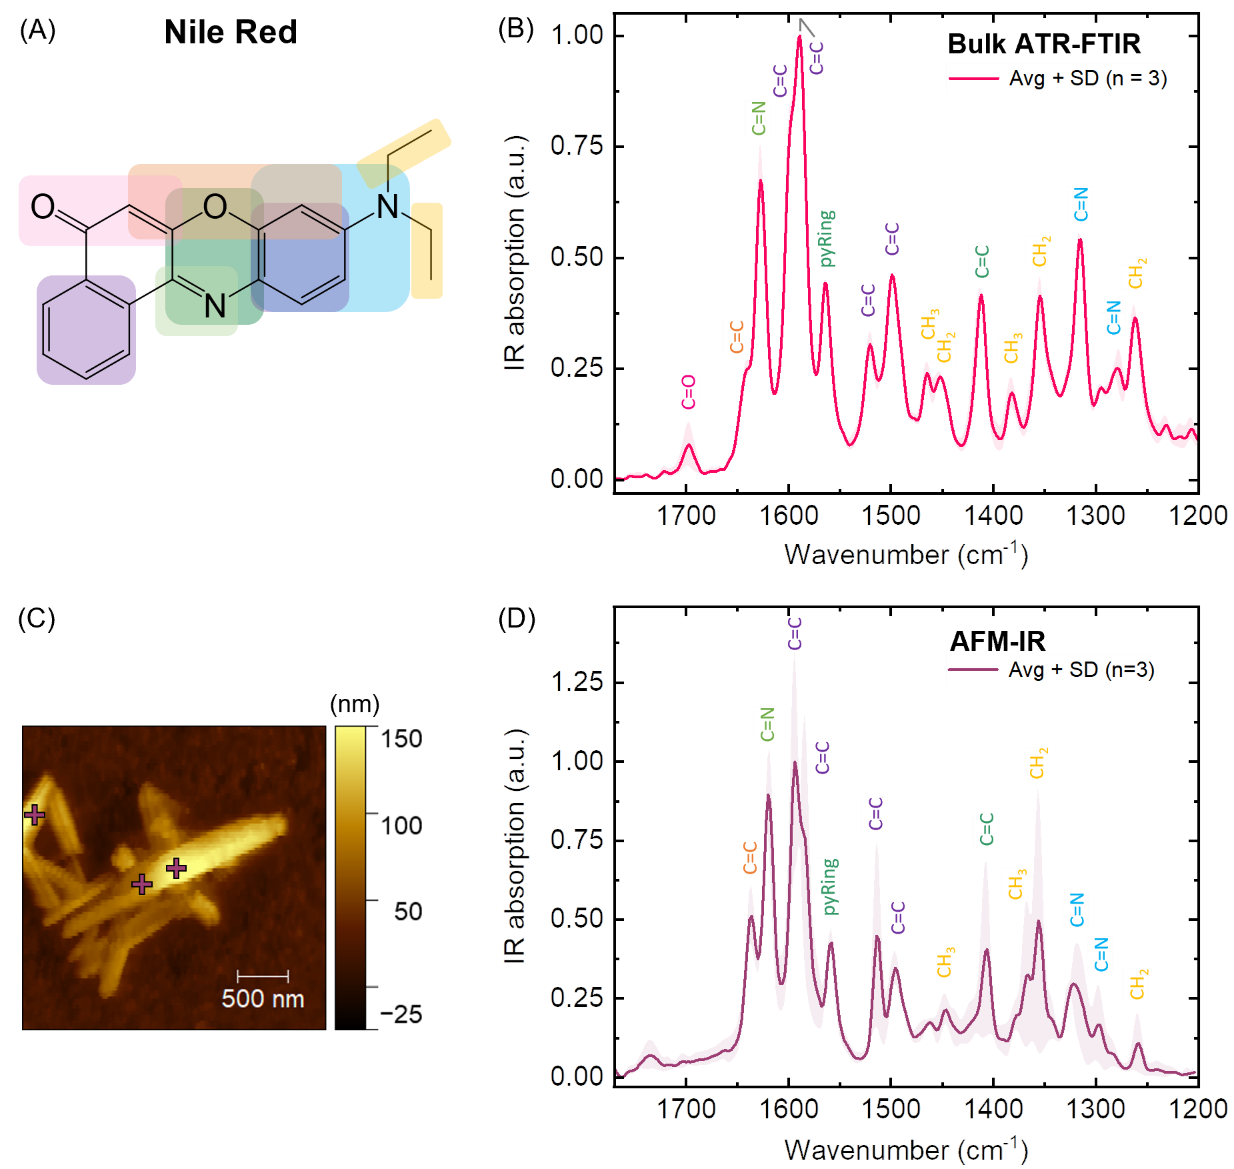


Figure S7. Nile Red Characterization. (A) Chemical structures. (B) Attenuated total reflection infrared spectroscopy (ATR-FTIR) spectra of Nile red. Peak assignment and relative functional groups are color coded. Avg, average; SD, standard deviation. (C) AFM morphology map of Nile Red crystal. (D) Infrared nanospectroscopy (AFM-IR) spectrum of Nile Red crystal. Average (Avg) ± Standard Error (SE), N = 3 independent measurements, each with n = 3 spectra. Crosses on the AFM maps indicate the location of acquisition of the AFM-IR spectra.

# Supplementary Tables

Table S1. Poly(ethylene terephthalate) peak assignment. Peak assignment for the attenuated total reflection infrared spectroscopy (ATR- FTIR) spectrum of Poly(ethylene terephthalate) microplastics.

| **Exact peak position**  **[cm-1]** | **Group** | **Assignment** | **Expected peak position**  **[cm-1]** | **IR band**  **[cm-1]** |
| --- | --- | --- | --- | --- |
| 1712 | Aryl carbonyl | *ν*C=O | 1717c / 1725e | 1715 – 1660a |
| 1613 | Aryl | *ν*C=C | ~1600a / 1615f | 1625 – 1590a |
| 1579 | Aryl | *ν*C=C | 1578e / ~1580a | 1590 – 1575a |
| 1504 | Aryl | *ν*C=C | 1506d | 1525 – 1470a |
| 1469 | Aryl | *ν*C=C | 1471e | 1470 – 1430a |
| 1455 | Aryl | *ν*C=C | 1450f | 1465 – 1530a |
| 1406 | Aryl | *ν*C=C | 1408e/ 1410f | 1420 – 1400a |
| 1372 | Ester | *γw*OCH2 | 1370d | 1385 – 1335a |
| 1341 | Ester | *γt*OCH2 | 1341d | 1325 – 1340a |
| 1241 | Ester | *ν*C-O-C *as* | 1245c / 1238e | 1310 – 1250a |

*γt twisting;γw, wagging; δ bending; ν stretching; as asymmetric; sym symmetric; i.p. in plane.*

1. Socrates, G. (2004) Infrared and Raman Characteristic Group Frequencies – Tables and Charts. Wiley
2. Larkin, PJ. (2011) Infrared and Raman Spectroscopy. Principles and Spectral Interpretation. Elsevier
3. Smith B. C (2022) Spectroscopy 37:10, 25-28
4. Donelli I. (2010) PolymDegrad Stab, 95:9, 1542-1550
5. El-Saftawy A.A. (2014) Radiation Physics and Chemistry 102, 96–102
6. Holland B.J. (2001) Polymer 43, 1834-1847

Table S2. Poly(lactic acid) peak assignment Peak assignment for the attenuated total reflection infrared spectroscopy (ATR- FTIR) spectrum of Poly(lactic acid) microplastics.

| **Exact peak position**  **[cm-1]** | **Group** | **Assignment** | **Expected peak position**  **[cm-1]** | **IR band**  **[cm-1]** |
| --- | --- | --- | --- | --- |
| 1748 | Carbonyl | *ν*C=O | 1752c / 1754d | 1750 – 1735a,b |
| 1453 | Methyl | *δ*CH3 *as* | 1450c / 1354d | 1465 – 1440a |
| 1381 | Methyl | *δ*CH3 *sym* | 1380c / 1383d | 1390 – 1370a,b |
| 1360 | Methine | *δ*CH | 1356c / 1365d | 1360 – 1320a |
| 1270 | α-Hydroxy ester | *δ*OH | 1265c | 1300 – 1260a |
| 1209 | Aliphatic ester | *ν*C-CO | 1210c | 1325 – 1115a |

*δ bending; ν stretching; as asymmetric; sym symmetric.*

1. Socrates, G. (2004) Infrared and Raman Characteristic Group Frequencies – Tables and Charts. Wiley
2. Larkin, PJ. (2011) Infrared and Raman Spectroscopy. Principles and Spectral Interpretation. Elsevier [pp. 67; 75-76]
3. Furukawa T. (2005) Macromolecules, 38:15, 6445–6454
4. Cai Y. (2013) J Polym Environ 21:108-114

Table S3. Poly(hydroxy butyrate) peak assignment. Peak assignment for the attenuated total reflection infrared spectroscopy (ATR- FTIR) spectrum of Poly(hydroxy butyrate) microplastics.

| **Exact peak position**  **[cm-1]** | **Group** | **Assignment** | **Expected peak position**  **[cm-1]** | **IR band**  **[cm-1]** |
| --- | --- | --- | --- | --- |
| 1722 | Carbonyl | *ν*C=O | 1723b | 1740 – 1700a |
| 1454 | Methyl | *δ*CH3 *as* | 1380c | 1470 – 1440a |
| 1405 | Carboxyl  Carboxyl | *δ*CH2CO  *ν*C-O | - | 1410 – 1405a  1440 – 1 395a |
| 1380 | Methyl | *δ*CH3 *sym* | 1380c | 1380 – 1370a |
| 1355 | Methylene | *γw*CH2 | 1356c | 1385 – 1335a |
| 1293 | Methylene | *δ*CH2 | 1294b / 1289c | 1345 – 1180a |
| 1281 | Carboxyl | *ν*C-O | 1280b / 1276c | 1320 – 1210a |
| 1261 | Methylene | *γt*CH2 | 1263b / 1260c | 1285 – 1215a |
| 1228 | Ester | *ν*C-O-C*as* | 1230b / 1227c | 1275 – 1185a |

*γr, rocking; γt, twisting; γw, wagging; δbending; ν stretching; as asymmetric; sym symmetric.*

1. Socrates, G. (2004) Infrared and Raman Characteristic Group Frequencies – Tables and Charts. Wiley
2. Padermshoke A. (2005) Spectrochimica Acta Part A 61, 541–550
3. Furukawa T. (2005) Macromolecules, 38:15, 6445–6454

Table S4. Polyethylene peak assignment. Peak assignment for the attenuated total reflection infrared spectroscopy (ATR- FTIR) spectrum of Polyethylene microplastics.

| **Exact peak position [cm-1]** | **Assignment** | **Expected peak position**  **[cm-1]** | **IR band**  **[cm-1]** |
| --- | --- | --- | --- |
| 1470 | *γs*CH2 | 1460 ± 15b | 1480 – 1440a |
| 1461 | *δ*CH2 | - |  |
| 1437 | *δ*CH3 a*s* | - | 1465 – 1435a |
| 1368 | *δ*CH3 *sym* | - | 1390 – 1360a |
| 1351 | *γw*CH2 | - | 1360 – 1320a |
| 1304 | *γt –(CH2)n–* | - | 1305 – 1295a |

*γs, scissoring; γt, twisting; γw, wagging; δ, bending; ν stretching; as asymmetric; sym symmetric.*

1. Socrates, G. (2004) Infrared and Raman Characteristic Group Frequencies – Tables and Charts. Wiley
2. Smith B. C. (2021) Spectroscopy 36:7 17-22

Table S5. Polypropylene peak assignment. Peak assignment for the attenuated total reflection infrared spectroscopy (ATR- FTIR) spectrum of Polypropylene microplastics.

| **Exact peak position [cm-1]** | **Group** | **Assignment** | **Expected peak position [cm-1]** | **IR band**  **[cm-1]** |
| --- | --- | --- | --- | --- |
| 1456 | Methyl | *δ*CH3 *as* | 1455 ± 15b | 1465 – 1440a |
| 1441 | Methylene | *γs*CH2 | - | 1480 – 1440a |
| 1374 | Methyl | *δs*CH3 | 1375 ± 10b | 1390 – 1370a |
| 1359 | Isopropyl | *δs*CH3 | - | 1400 – 1360a |
| 1305 | Methylene | *γt*CH2 | - | 1305 – 1295a |

*γs, scissoring; γt, twisting; δ, bending; ν stretching; as asymmetric, sym symmetric.*

1. Socrates, G. (2004) Infrared and Raman Characteristic Group Frequencies – Tables and Charts. Wiley
2. Smith B. C. (2021) Spectroscopy 36:11, 22–25

Table S6. Polystyrene peak assignment. Peak assignment for the attenuated total reflection infrared spectroscopy (ATR- FTIR) spectrum of Polystyrene microplastics.

| **Exact peak position**  **[cm-1]** | **Group** | **Assignment** | **Expected peak position**  **[cm-1]** | **IR band**  **[cm-1]** |
| --- | --- | --- | --- | --- |
| 1745 | Aryl | *δ*CH *o.p.* | 1741b | 2000 – 1660a |
| 1600 | Aryl | *ν*C=C | 1601b | 1600 – 1430a |
| 1582 | Aryl | *ν*C=C | 1580a | 1590 – 1575a |
| 1492 | Aryl | *ν*C=C | 1493b | 1525 – 1470a |
| 1452 | Methylene  Aryl | *δ*CH2  *ν*C=C | 1451 | 1480 – 1440a  1470 – 1430a |
| 1372 | Ethyl | *δ*CH3 *sym* | - | 1385 – 1370a |
| 1326 | Methine | *δ*CH | - | 1360 – 1320a |
| 1310 | Ethyl | *γw,*CH2 | - | 1365 – 1295a |

*γt twisting;γw, wagging; δ bending; ν stretching; as asymmetric; sym symmetric; o.p. out of plane.*

1. Socrates, G. (2004) Infrared and Raman Characteristic Group Frequencies – Tables and Charts. Wiley
2. Nishikita, T. (2003) Infrared and Raman analysis of polymers. Marcel Dekker, Inc.

Table S7. Nile Red peak assignment. Peak assignment for the attenuated total reflection infrared spectroscopy (ATR- FTIR) spectrum of Nile Red.

| **Exact peak position**  **[cm-1]** | **Group** | **Assignment** | **IR band**  **[cm-1]** |
| --- | --- | --- | --- |
| 1698 | α,β-unsaturated ketone | *ν*C=O | 1700 - 1660 |
| 1642 | Vinyl ether | *ν*C=C | 1660 - 1630 |
| 1627 | Imine | *ν*C=N | 1690 - 1630 |
| 1595 | Aryl | *ν*C=C | 1625 - 1590 |
| 1589 | Aryl | *ν*C=C | 1590 - 1575 |
| 1564 | Pyridine | *ν*Ring | 1590 - 1565 |
| 1519 | Aryl | *ν*C=C | 1525 - 1470 |
| 1499 | Aryl | *ν*C=C | 1525 - 1470 |
| 1464 | Ethyl | *δ*CH3 *asym* | 1475 - 1445 |
| 1452 | Ethyl | δCH2 | 1470 - 1440 |
| 1413 | Pyridine | *ν*C=C | 1450 - 1410 |
| 1382 | Ethyl | *δ*CH3 *sym* | 1390 - 1360 |
| 1353 | Ethyl | *γw*CH2 | 1360 - 1320 |
| 1316 | Tertiary aromatic amine | *ν*C-N | 1380 - 1265 |
| 1276 | Tertiary aromatic amines | *ν*C-N | 1380 - 1265 |
| 1261 | Ethyl | *γt*CH2 | 1285 - 1215 |

*γt twisting;γw, wagging; δ bending; ν stretching; as asymmetric; sym symmetric; i.p. in plane.*

Ref: Socrates, G. (2004) Infrared and Raman Characteristic Group Frequencies – Tables and Charts. Wiley
